# Supplementary material for: The Chemical Profiling of Essential Oils from Different Tissues of Cinnamomum camphora L. and Their Antimicrobial Activities
Source: MDPI journal article supplement (doi:10.3390/molecules26175132), 2021-08-24
Supplement: s1 [file s1]

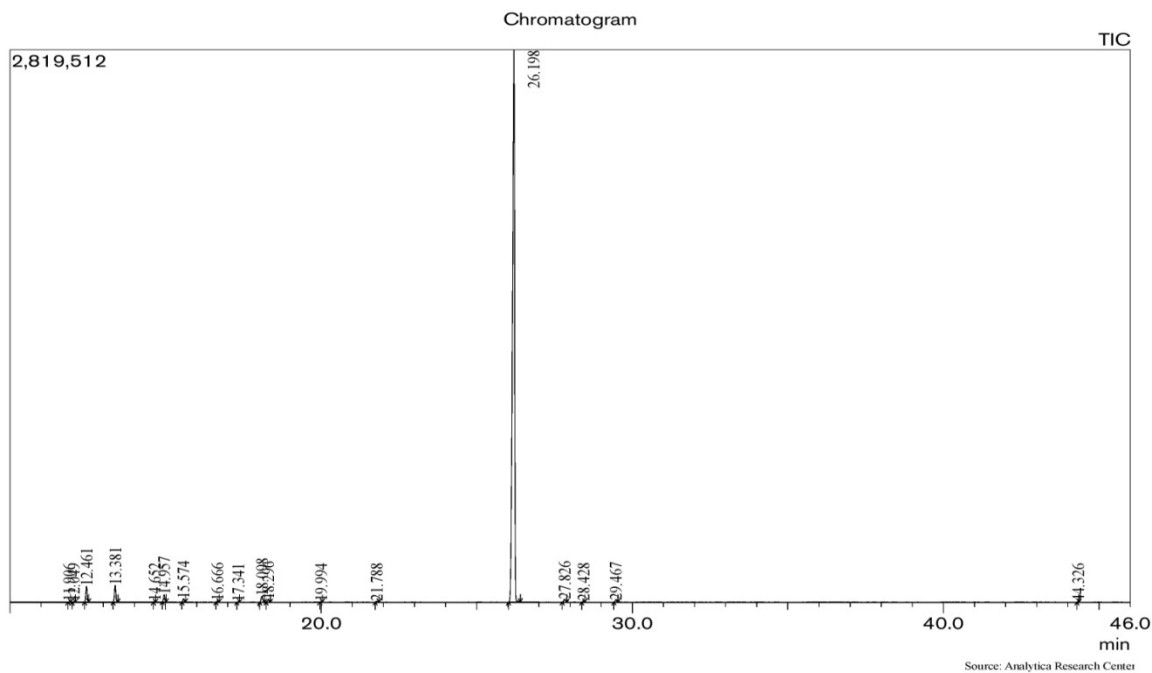

Figure S1: Gas chromatogram of leaf essential oil of *Cinnamomum camphora* L.

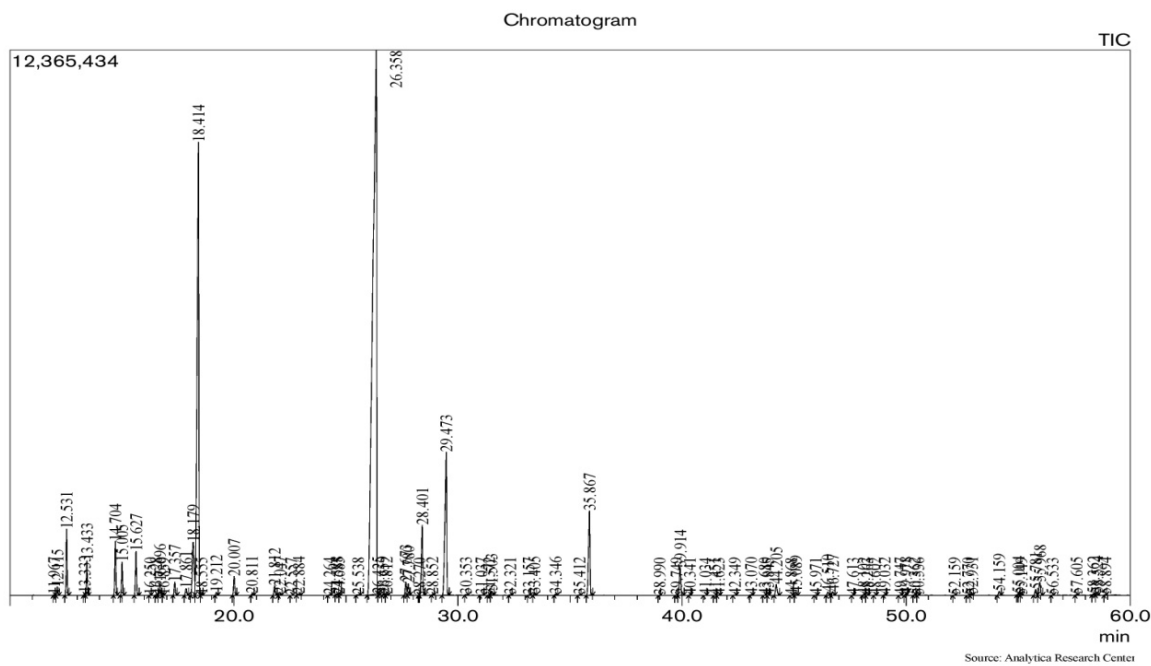

Figure S2: Gas chromatogram of wood essential oil of *Cinnamomum camphora* L.

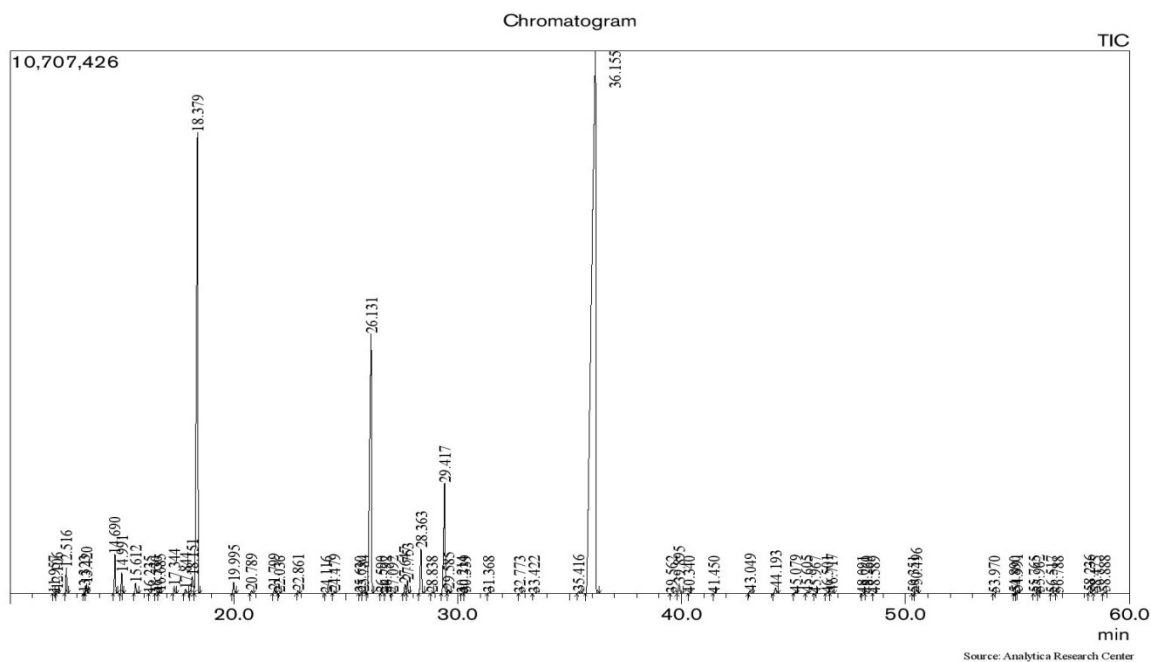

Figure S3: Gas chromatogram of root essential oil of *Cinnamomum camphora* L.

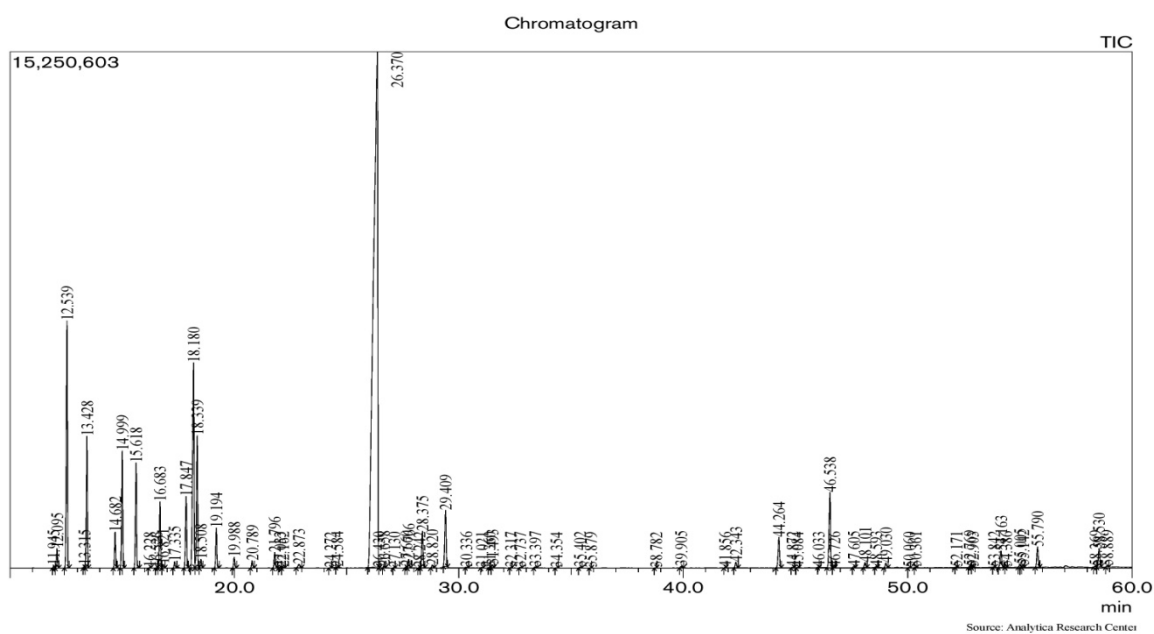

Figure S4: Gas chromatogram of branch essential oil of *Cinnamomum camphora* L.

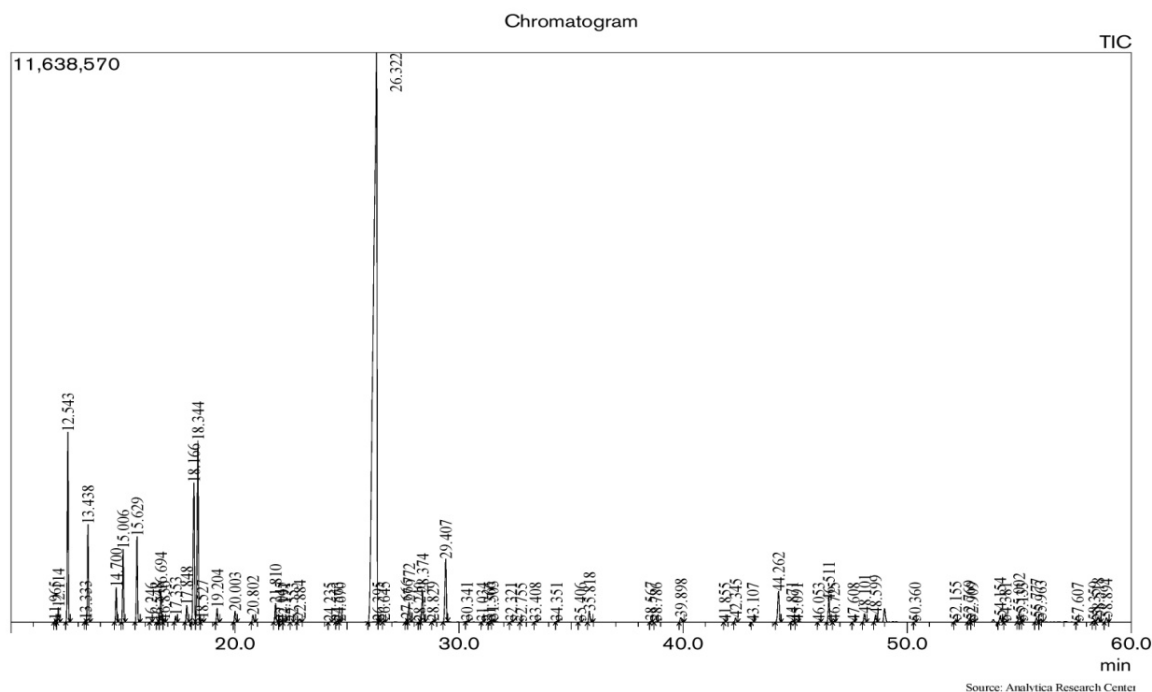

Figure S5: Gas chromatogram of leaf/branch/wood essential oil of *Cinnamomum camphora* L.

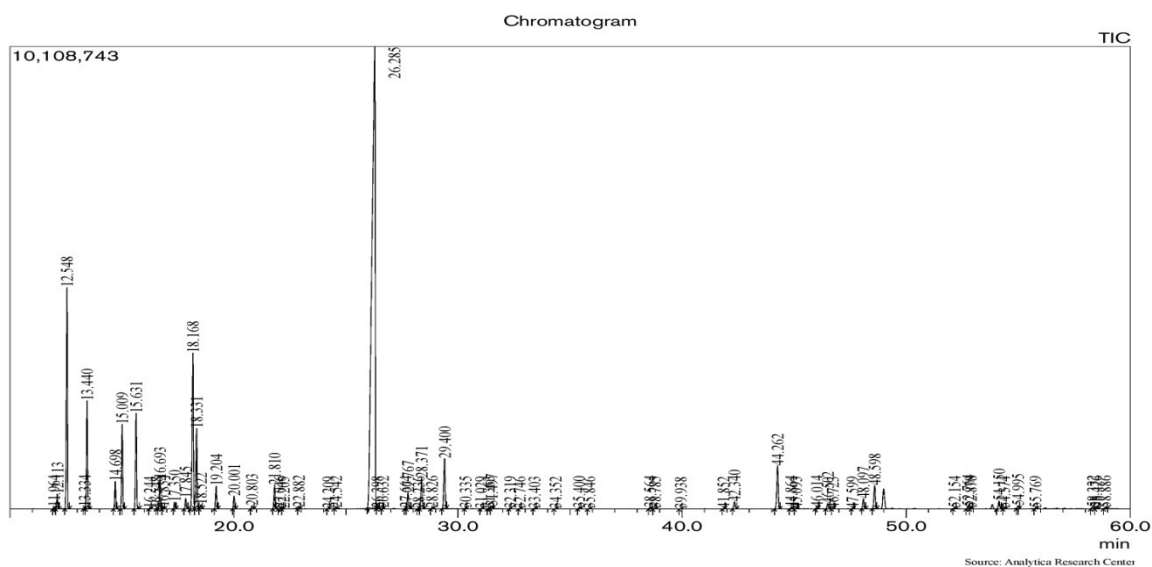

Figure S6: Gas chromatogram of leaf/branch essential oil of *Cinnamomum camphora* L.
